# Supplementary material
Source: PubMed Central journal article supplement (PMC8715910)
Supplement: NIHMS1763010-supplement-Supplemental_Material.pdf [file NIHMS1763010-supplement-Supplemental_Material.pdf]

# Supplementary Material for “Two-phase analysis and study design for survival models with error-prone exposures”

Kyunghee Han<sup>1</sup>, Thomas Lumley<sup>2</sup>, Bryan E. Shepherd<sup>3</sup> and Pamela A. Shaw<sup>1</sup>

<sup>1</sup>University of Pennsylvania, USA

<sup>2</sup>University of Auckland, New Zealand

<sup>3</sup>Vanderbilt University, USA

## A Technical details

### A.1 Regularity conditions for Theorem 1

We assume there exists  $J \geq 1$  such that  $P(Y \leq t_J)$  with probability one. Let  $\boldsymbol{\theta}_0 \in \Theta_0$  be the true parameter for some open  $\Theta_0 \subset \mathbf{R}^{J+d}$  and further assume the following conditions:

- A1.  $E|L_1(\boldsymbol{\theta}; Y, \Delta, \mathbf{X})| < \infty$  at  $\boldsymbol{\theta}_0$ .
- A2.  $L_1(\boldsymbol{\theta}; Y, \Delta, \mathbf{X})$  is three-times continuously differentiable and bounded away from 0 near  $\boldsymbol{\theta}_0$  (a.s.).
- A3.  $I_V = -E\left[\frac{\partial^2}{\partial\boldsymbol{\theta}\partial\boldsymbol{\theta}^\top} \log L_1(\boldsymbol{\theta}; Y, \Delta, \mathbf{X})\right]$  is positive definite at  $\boldsymbol{\theta}_0$ .
- A4.  $\pi(y, \delta, \mathbf{z}) > 0$  for all  $(y, \delta, \mathbf{z})$ .

Since we have formulated discrete-time survival models where the censoring time  $C$  is bounded away from infinity, the right-censored survival time  $Y$  has an upper-bound  $t_J$  almost surely so that finite numbers of baseline hazards suffice to specify likelihood for the discrete-time survival model (1). Without loss of generality, we write  $\boldsymbol{\alpha} = (\alpha_1, \dots, \alpha_J)^\top$  by the transformation of baseline hazards. Then, the above assumptions A1–A4 are the regularity conditions for the maximum likelihood estimation of finite-dimensional parameters  $\boldsymbol{\theta} = (\boldsymbol{\alpha}, \boldsymbol{\beta})$ , and therefore, the proof follows Theorem 1 in Reilly and Pepe (1995) which we refer the reader to for details.

### A.2 Some derivations for numerical implementation

For the implementation of the optimal design in our numerical simulations, we empirically estimated certain parameters by generating a large independent sample of  $N_0$  individuals. Let  $\mathcal{X}_{N_0}^* = \{(Y_i^*, \Delta_i^*, \mathbf{X}_i^*, \mathbf{Z}_i^*) : 1 \leq i \leq N_0\}$  be an external random sample of  $(Y, \Delta, \mathbf{X}, \mathbf{Z})$  independent on  $\mathcal{X}_N$  or  $\mathcal{X}_{I,N}$ . We estimate

unknown quantities in the optimal sampling design (7) by

$$\begin{aligned}\widehat{I}_V^* &= -\frac{1}{N_0} \sum_{i=1}^{N_0} \frac{\partial^2}{\partial \boldsymbol{\theta} \partial \boldsymbol{\theta}^\top} \log L_1(\boldsymbol{\theta}; Y_i^*, \Delta_i^*, \mathbf{X}_i^*), \\ \widehat{\text{Var}}^*(U_1(\boldsymbol{\theta})|y, \delta, \mathbf{z}) &= \frac{N^*(y, \delta, \mathbf{z})}{N^*(y, \delta, \mathbf{z}) - 1} \{\widehat{\mu}_2^*(\boldsymbol{\theta}; y, \delta, \mathbf{z}) - \widehat{\mu}_1^*(\boldsymbol{\theta}; y, \delta, \mathbf{z})^2\},\end{aligned}\tag{A.1}$$

where  $N^*(y, \delta, \mathbf{z}) = \sum_{i=1}^{N_0} \mathbb{I}(Y_i^* = y, \Delta_i^* = \delta, \mathbf{Z}_i^* = \mathbf{z})$  and

$$\widehat{\mu}_\ell^*(\boldsymbol{\theta}; y, \delta, \mathbf{z}) = \frac{1}{N^*(y, \delta, \mathbf{z})} \sum_{i=1}^{N_0} U_1(\boldsymbol{\theta}; Y_i^*, \Delta_i^*, \mathbf{X}_i^*)^\ell \cdot \mathbb{I}(Y_i^* = y, \Delta_i^* = \delta, \mathbf{Z}_i^* = \mathbf{z})\tag{A.2}$$

for  $\ell = 1, 2$ .

We now introduce some derivations for Newton-Raphson algorithm. Recall that the discrete-time survival model (1) under the odds transformation  $g_1(u) = \frac{u}{1-u}$  is given by  $\text{logit}(\lambda_j(\mathbf{x})) = \alpha_j + \boldsymbol{\beta}^\top \mathbf{x}$ , where  $\alpha_j = \text{logit}(\lambda_{0j})$  is the logit transformation of the baseline hazard. The maximum likelihood estimates of  $\boldsymbol{\alpha}$  and  $\boldsymbol{\beta}$  are obtained by solving score equations of (4) with

$$\begin{aligned}\frac{\partial}{\partial \alpha_j} Q_N(\boldsymbol{\alpha}, \boldsymbol{\beta}) &= \sum_{i \in \mathcal{I}} \widehat{\pi}(Y_i, \Delta_i, \mathbf{Z}_i)^{-1} \mathbb{I}(j \leq J(i)) \left( D_{ij} - \frac{e^{\alpha_j + \boldsymbol{\beta}^\top \mathbf{X}_i}}{1 + e^{\alpha_j + \boldsymbol{\beta}^\top \mathbf{X}_i}} \right) = 0, \\ \frac{\partial}{\partial \boldsymbol{\beta}} Q_N(\boldsymbol{\alpha}, \boldsymbol{\beta}) &= \sum_{i \in \mathcal{I}} \widehat{\pi}(Y_i, \Delta_i, \mathbf{Z}_i)^{-1} \sum_{j=1}^{J(i)} \left( D_{ij} - \frac{e^{\alpha_j + \boldsymbol{\beta}^\top \mathbf{X}_i}}{1 + e^{\alpha_j + \boldsymbol{\beta}^\top \mathbf{X}_i}} \right) \mathbf{X}_i = \mathbf{0}.\end{aligned}\tag{A.3}$$

We numerically solve the system of equations (A.3) with the Newton-Raphson algorithm using the associated Hessian matrix whose components consist of

$$\begin{aligned}\frac{\partial^2}{\partial \alpha_j \partial \alpha_{j'}} Q_N(\boldsymbol{\alpha}, \boldsymbol{\beta}) &= - \sum_{i \in \mathcal{I}} \widehat{\pi}(Y_i, \Delta_i, \mathbf{Z}_i)^{-1} \mathbb{I}(j \leq J(i)) \frac{e^{\alpha_j + \boldsymbol{\beta}^\top \mathbf{X}_i}}{(1 + e^{\alpha_j + \boldsymbol{\beta}^\top \mathbf{X}_i})^2} \mathbb{I}(j = j'), \\ \frac{\partial^2}{\partial \alpha_j \partial \boldsymbol{\beta}} Q_N(\boldsymbol{\alpha}, \boldsymbol{\beta}) &= - \sum_{i \in \mathcal{I}} \widehat{\pi}(Y_i, \Delta_i, \mathbf{Z}_i)^{-1} \mathbb{I}(j \leq J(i)) \frac{e^{\alpha_j + \boldsymbol{\beta}^\top \mathbf{X}_i}}{(1 + e^{\alpha_j + \boldsymbol{\beta}^\top \mathbf{X}_i})^2} \mathbf{X}_i, \\ \frac{\partial^2}{\partial \boldsymbol{\beta} \partial \boldsymbol{\beta}^\top} Q_N(\boldsymbol{\alpha}, \boldsymbol{\beta}) &= - \sum_{i \in \mathcal{I}} \widehat{\pi}(Y_i, \Delta_i, \mathbf{Z}_i)^{-1} \sum_{j=1}^{J(i)} \frac{e^{\alpha_j + \boldsymbol{\beta}^\top \mathbf{X}_i}}{(1 + e^{\alpha_j + \boldsymbol{\beta}^\top \mathbf{X}_i})^2} \mathbf{X}_i \mathbf{X}_i^\top.\end{aligned}\tag{A.4}$$

Similarly, suppose the complementary log transformation  $g_2(u) = -\log(1-u)$  defines the true survival model (1). Then it can be easily seen that  $\text{logit}(\lambda_j(\mathbf{x})) = \exp(e^{\alpha_j + \boldsymbol{\beta}^\top \mathbf{x}}) - 1$ , where  $\alpha_j = \log(-\log(1 - \lambda_{0j}))$  is the complementary log-log transformation of the baseline hazard. The maximum likelihood esti-

mates of  $\boldsymbol{\theta} = (\boldsymbol{\alpha}, \boldsymbol{\beta})$  are obtained by solving score equations of (4) with

$$\begin{aligned}\frac{\partial}{\partial \alpha_j} Q_N(\boldsymbol{\alpha}, \boldsymbol{\beta}) &= \sum_{i \in \mathcal{I}} \hat{\pi}(Y_i, \Delta_i, \mathbf{Z}_i)^{-1} \mathbb{I}(j \leq J(i)) \left( D_{ij} \frac{e^{\alpha_j + \boldsymbol{\beta}^\top \mathbf{X}_i}}{1 - e^{\exp(\alpha_j + \boldsymbol{\beta}^\top \mathbf{X}_i)}} - e^{\alpha_j + \boldsymbol{\beta}^\top \mathbf{X}_i} \right) = 0, \\ \frac{\partial}{\partial \boldsymbol{\beta}} Q_N(\boldsymbol{\alpha}, \boldsymbol{\beta}) &= \sum_{i \in \mathcal{I}} \hat{\pi}(Y_i, \Delta_i, \mathbf{Z}_i)^{-1} \sum_{j=1}^{J(i)} \left( D_{ij} \frac{e^{\alpha_j + \boldsymbol{\beta}^\top \mathbf{X}_i}}{1 - e^{\exp(\alpha_j + \boldsymbol{\beta}^\top \mathbf{X}_i)}} - e^{\alpha_j + \boldsymbol{\beta}^\top \mathbf{X}_i} \right) \mathbf{X}_i = \mathbf{0}.\end{aligned}\tag{A.5}$$

We numerically solve the system of equations (A.5) with the Newton-Raphson algorithm using the associated Hessian matrix whose components consist of

$$\begin{aligned}\frac{\partial^2}{\partial \alpha_j \partial \alpha_{j'}} Q_N(\boldsymbol{\alpha}, \boldsymbol{\beta}) &= - \sum_{i \in \mathcal{I}} \hat{\pi}(Y_i, \Delta_i, \mathbf{Z}_i)^{-1} \mathbb{I}(j \leq J(i)) \left\{ D_{ij} \frac{e^{\alpha_j + \boldsymbol{\beta}^\top \mathbf{X}_i}}{1 - e^{\exp(\alpha_j + \boldsymbol{\beta}^\top \mathbf{X}_i)}} \times \right. \\ &\quad \left. \left( 1 - \frac{e^{\alpha_j + \boldsymbol{\beta}^\top \mathbf{X}_i} e^{-\exp(\alpha_j + \boldsymbol{\beta}^\top \mathbf{X}_i)}}{1 - e^{\exp(\alpha_j + \boldsymbol{\beta}^\top \mathbf{X}_i)}} \right) - e^{\alpha_j + \boldsymbol{\beta}^\top \mathbf{X}_i} \right\} \mathbb{I}(j = j'), \\ \frac{\partial^2}{\partial \alpha_j \partial \boldsymbol{\beta}} Q_N(\boldsymbol{\alpha}, \boldsymbol{\beta}) &= - \sum_{i \in \mathcal{I}} \hat{\pi}(Y_i, \Delta_i, \mathbf{Z}_i)^{-1} \mathbb{I}(j \leq J(i)) \left\{ D_{ij} \frac{e^{\alpha_j + \boldsymbol{\beta}^\top \mathbf{X}_i}}{1 - e^{\exp(\alpha_j + \boldsymbol{\beta}^\top \mathbf{X}_i)}} \times \right. \\ &\quad \left. \left( 1 - \frac{e^{\alpha_j + \boldsymbol{\beta}^\top \mathbf{X}_i} e^{-\exp(\alpha_j + \boldsymbol{\beta}^\top \mathbf{X}_i)}}{1 - e^{\exp(\alpha_j + \boldsymbol{\beta}^\top \mathbf{X}_i)}} \right) - e^{\alpha_j + \boldsymbol{\beta}^\top \mathbf{X}_i} \right\} \mathbf{X}_i, \\ \frac{\partial^2}{\partial \boldsymbol{\beta} \partial \boldsymbol{\beta}^\top} Q_N(\boldsymbol{\alpha}, \boldsymbol{\beta}) &= - \sum_{i \in \mathcal{I}} \hat{\pi}(Y_i, \Delta_i, \mathbf{Z}_i)^{-1} \sum_{j=1}^{J(i)} \left\{ D_{ij} \frac{e^{\alpha_j + \boldsymbol{\beta}^\top \mathbf{X}_i}}{1 - e^{\exp(\alpha_j + \boldsymbol{\beta}^\top \mathbf{X}_i)}} \times \right. \\ &\quad \left. \left( 1 - \frac{e^{\alpha_j + \boldsymbol{\beta}^\top \mathbf{X}_i} e^{-\exp(\alpha_j + \boldsymbol{\beta}^\top \mathbf{X}_i)}}{1 - e^{\exp(\alpha_j + \boldsymbol{\beta}^\top \mathbf{X}_i)}} \right) - e^{\alpha_j + \boldsymbol{\beta}^\top \mathbf{X}_i} \right\} \mathbf{X}_i \mathbf{X}_i^\top.\end{aligned}\tag{A.6}$$

## B Additional numerical results

### B.1 Supplemental tables for the simulation study

Table B.1: Relative performance for the estimation of  $\beta_1$  is compared for (i) the complete case analysis with simple random sampling (CC-SRS), (ii) the mean score method with simple random sampling (MS-SRS), (iii) a design-based estimation with balanced sample, equivalent to the mean score (MS-BAL), (iv & v) the mean score estimation with adaptive sampling (MS-A) and the optimal sampling design (MS-O), for varying sample sizes. Results for the full cohort estimator based on complete data are provided as a benchmark. Mean squared error (MSE) and its bias-variance decomposition are estimated from 1000 Monte Carlo replications, where the censoring rate was 30%. The adaptive and optimal sampling designs were for efficient estimation of  $X_1$  with  $\beta_1 = \log(1.5) \approx 0.405$ . In all scenarios, we took equal proportions for the pilot and adaptive samples.

| Sampling    | Estimation | Criterion           | Estimation performance by sample sizes |           |           |            |            |            |
|-------------|------------|---------------------|----------------------------------------|-----------|-----------|------------|------------|------------|
|             |            |                     | $N = 4000$                             |           |           | $n = 400$  |            |            |
|             |            |                     | $n = 200$                              | $n = 400$ | $n = 800$ | $N = 2000$ | $N = 4000$ | $N = 8000$ |
| Full cohort | CC         | $\sqrt{\text{MSE}}$ | 0.079                                  | 0.079     | 0.079     | 0.112      | 0.079      | 0.056      |
|             |            | Bias                | 0.004                                  | 0.004     | 0.004     | 0.000      | 0.004      | 0.001      |
|             |            | $\sqrt{\text{Var}}$ | 0.079                                  | 0.079     | 0.079     | 0.112      | 0.079      | 0.056      |
| SRS         | CC         | $\sqrt{\text{MSE}}$ | 0.408                                  | 0.284     | 0.198     | 0.281      | 0.284      | 0.282      |
|             |            | Bias                | 0.013                                  | 0.012     | 0.011     | 0.013      | 0.012      | 0.015      |
|             |            | $\sqrt{\text{Var}}$ | 0.408                                  | 0.284     | 0.197     | 0.281      | 0.284      | 0.282      |
|             | MS         | $\sqrt{\text{MSE}}$ | 0.268                                  | 0.177     | 0.132     | 0.191      | 0.177      | 0.170      |
|             |            | Bias                | 0.067                                  | 0.016     | 0.012     | 0.014      | 0.016      | 0.017      |
|             |            | $\sqrt{\text{Var}}$ | 0.259                                  | 0.176     | 0.131     | 0.190      | 0.176      | 0.169      |
| Balanced    | MS         | $\sqrt{\text{MSE}}$ | 0.302                                  | 0.216     | 0.153     | 0.219      | 0.216      | 0.202      |
|             |            | Bias                | 0.023                                  | 0.017     | 0.015     | 0.010      | 0.017      | 0.018      |
|             |            | $\sqrt{\text{Var}}$ | 0.301                                  | 0.215     | 0.152     | 0.219      | 0.215      | 0.201      |
| Adaptive    | MS         | $\sqrt{\text{MSE}}$ | 0.279                                  | 0.168     | 0.114     | 0.181      | 0.168      | 0.159      |
|             |            | Bias                | 0.038                                  | 0.024     | 0.011     | 0.012      | 0.024      | 0.017      |
|             |            | $\sqrt{\text{Var}}$ | 0.276                                  | 0.166     | 0.113     | 0.181      | 0.166      | 0.158      |
| Oracle      | MS         | $\sqrt{\text{MSE}}$ | 0.213                                  | 0.155     | 0.112     | 0.166      | 0.155      | 0.137      |
|             |            | Bias                | 0.025                                  | 0.001     | 0.001     | 0.005      | 0.001      | 0.002      |
|             |            | $\sqrt{\text{Var}}$ | 0.212                                  | 0.155     | 0.112     | 0.166      | 0.155      | 0.137      |

Table B.2: Relative performance for the estimation of  $\beta_1$  is compared for (i) the complete case analysis with simple random sampling (CC-SRS), (ii) the mean score method with simple random sampling (MS-SRS), (iii) a design-based estimation with balanced sample, equivalent to the mean score (MS-BAL), (iv & v) the mean score estimation with adaptive sampling (MS-A) and the optimal sampling design (MS-O), for varying sample sizes. Results for the full cohort estimator based on complete data are provided as a benchmark. Mean squared error (MSE) and its bias-variance decomposition are estimated from 1000 Monte Carlo replications, where the censoring rate was 70%. The adaptive and optimal sampling designs were for efficient estimation of  $X_1$  with  $\beta_1 = \log(1.5) \approx 0.405$ . In all scenarios, we took equal proportions for the pilot and adaptive samples.

| Sampling    | Estimation | Criterion           | Estimation performance by sample sizes |           |           |            |            |            |
|-------------|------------|---------------------|----------------------------------------|-----------|-----------|------------|------------|------------|
|             |            |                     | $N = 4000$                             |           |           | $n = 400$  |            |            |
|             |            |                     | $n = 200$                              | $n = 400$ | $n = 800$ | $N = 2000$ | $N = 4000$ | $N = 8000$ |
| Full cohort | CC         | $\sqrt{\text{MSE}}$ | 0.119                                  | 0.119     | 0.119     | 0.175      | 0.119      | 0.086      |
|             |            | Bias                | 0.000                                  | 0.000     | 0.000     | 0.004      | 0.000      | 0.003      |
|             |            | $\sqrt{\text{Var}}$ | 0.119                                  | 0.119     | 0.119     | 0.175      | 0.119      | 0.086      |
| SRS         | CC         | $\sqrt{\text{MSE}}$ | 0.630                                  | 0.420     | 0.299     | 0.442      | 0.420      | 0.419      |
|             |            | Bias                | 0.025                                  | 0.016     | 0.002     | -0.005     | 0.016      | 0.018      |
|             |            | $\sqrt{\text{Var}}$ | 0.630                                  | 0.420     | 0.299     | 0.442      | 0.420      | 0.418      |
|             | MS         | $\sqrt{\text{MSE}}$ | 0.477                                  | 0.304     | 0.208     | 0.328      | 0.304      | 0.287      |
|             |            | Bias                | 0.177                                  | 0.078     | 0.018     | 0.065      | 0.078      | 0.081      |
|             |            | $\sqrt{\text{Var}}$ | 0.443                                  | 0.294     | 0.207     | 0.322      | 0.294      | 0.273      |
| Balanced    | MS         | $\sqrt{\text{MSE}}$ | 0.535                                  | 0.330     | 0.225     | 0.347      | 0.330      | 0.327      |
|             |            | Bias                | 0.092                                  | 0.026     | 0.005     | 0.033      | 0.026      | 0.029      |
|             |            | $\sqrt{\text{Var}}$ | 0.527                                  | 0.329     | 0.224     | 0.346      | 0.329      | 0.326      |
| Adaptive    | MS         | $\sqrt{\text{MSE}}$ | 0.411                                  | 0.250     | 0.178     | 0.259      | 0.250      | 0.225      |
|             |            | Bias                | 0.018                                  | 0.007     | 0.001     | 0.003      | 0.007      | 0.003      |
|             |            | $\sqrt{\text{Var}}$ | 0.410                                  | 0.250     | 0.178     | 0.259      | 0.250      | 0.225      |
| Oracle      | MS         | $\sqrt{\text{MSE}}$ | 0.315                                  | 0.215     | 0.174     | 0.250      | 0.215      | 0.224      |
|             |            | Bias                | 0.023                                  | 0.010     | 0.000     | 0.017      | 0.010      | 0.008      |
|             |            | $\sqrt{\text{Var}}$ | 0.314                                  | 0.214     | 0.174     | 0.249      | 0.214      | 0.224      |

Table B.3: Relative performance for the estimation of regression parameters is compared for (i) the complete case analysis with simple random sampling (CC-SRS), (ii) the mean score method with simple random sampling (MS-SRS), (iii) a design-based estimation with balanced sample, equivalent to the mean score (MS-BAL), (iv & v) the mean score estimation with adaptive sampling (MS-A) and the optimal sampling design (MS-O), where  $n = 200$  subsample was drawn from the full cohort size of  $N = 4000$ . Results for the full cohort estimator based on complete data are provided as a benchmark. Mean squared error (MSE) and its bias-variance decomposition are estimated from 1000 Monte Carlo replications, where the censoring rate was 50%. The adaptive and optimal sampling designs were for efficient estimation of  $X_1$  with  $\beta_1 = \log(1.5) \approx 0.405$ .

| Sample size          | Sampling | Estimation          | Criterion           | Estimation performance by regression coefficient |            |            |            |            |            |           |           |           |           |
|----------------------|----------|---------------------|---------------------|--------------------------------------------------|------------|------------|------------|------------|------------|-----------|-----------|-----------|-----------|
|                      |          |                     |                     | $\alpha_1$                                       | $\alpha_2$ | $\alpha_3$ | $\alpha_4$ | $\alpha_5$ | $\alpha_6$ | $\beta_1$ | $\beta_2$ | $\beta_3$ | $\beta_4$ |
| $n = 200$            | SRS      | CC                  | $\sqrt{\text{MSE}}$ | 0.547                                            | 0.520      | 0.447      | 0.429      | 0.409      | 0.396      | 0.470     | 0.555     | 0.214     | 0.203     |
|                      |          |                     | Bias                | -0.086                                           | -0.076     | -0.064     | -0.034     | -0.033     | -0.008     | 0.017     | -0.017    | 0.013     | -0.009    |
|                      |          |                     | $\sqrt{\text{Var}}$ | 0.540                                            | 0.514      | 0.443      | 0.428      | 0.408      | 0.396      | 0.470     | 0.555     | 0.214     | 0.202     |
|                      | MS       | $\sqrt{\text{MSE}}$ | 0.479               | 0.381                                            | 0.330      | 0.316      | 0.306      | 0.301      | 0.332      | 0.602     | 0.236     | 0.219     |           |
|                      |          | Bias                | -0.267              | -0.166                                           | -0.112     | -0.086     | -0.074     | -0.056     | 0.053      | -0.021    | 0.020     | -0.017    |           |
|                      |          | $\sqrt{\text{Var}}$ | 0.398               | 0.343                                            | 0.310      | 0.304      | 0.297      | 0.295      | 0.330      | 0.601     | 0.235     | 0.218     |           |
| $N = 4000$           | Balanced | MS                  | $\sqrt{\text{MSE}}$ | 0.405                                            | 0.401      | 0.399      | 0.398      | 0.398      | 0.405      | 0.400     | 0.859     | 0.317     | 0.299     |
|                      |          |                     | Bias                | -0.023                                           | -0.011     | -0.009     | -0.002     | 0.009      | 0.034      | 0.042     | -0.034    | 0.025     | -0.017    |
|                      |          |                     | $\sqrt{\text{Var}}$ | 0.404                                            | 0.400      | 0.399      | 0.398      | 0.398      | 0.403      | 0.398     | 0.858     | 0.317     | 0.298     |
| Adaptive             | MS       | $\sqrt{\text{MSE}}$ | 0.332               | 0.324                                            | 0.323      | 0.323      | 0.325      | 0.326      | 0.374      | 0.720     | 0.255     | 0.251     |           |
|                      |          | Bias                | -0.018              | -0.007                                           | -0.006     | -0.001     | 0.006      | 0.024      | 0.049      | -0.065    | 0.025     | -0.028    |           |
|                      |          | $\sqrt{\text{Var}}$ | 0.331               | 0.324                                            | 0.323      | 0.323      | 0.325      | 0.325      | 0.371      | 0.717     | 0.254     | 0.249     |           |
| Oracle               | MS       | $\sqrt{\text{MSE}}$ | 0.258               | 0.253                                            | 0.255      | 0.252      | 0.251      | 0.254      | 0.253      | 0.519     | 0.198     | 0.189     |           |
|                      |          | Bias                | -0.013              | 0.003                                            | 0.002      | 0.005      | 0.007      | 0.018      | 0.009      | -0.027    | 0.001     | -0.017    |           |
|                      |          | $\sqrt{\text{Var}}$ | 0.257               | 0.253                                            | 0.255      | 0.252      | 0.251      | 0.253      | 0.252      | 0.518     | 0.198     | 0.188     |           |
| Full cohort analysis |          |                     | $\sqrt{\text{MSE}}$ | 0.107                                            | 0.096      | 0.091      | 0.085      | 0.080      | 0.079      | 0.094     | 0.116     | 0.044     | 0.042     |
|                      |          |                     | Bias                | -0.010                                           | 0.000      | -0.003     | -0.002     | -0.005     | -0.002     | 0.003     | -0.001    | -0.000    | 0.000     |
|                      |          |                     | $\sqrt{\text{Var}}$ | 0.107                                            | 0.096      | 0.091      | 0.085      | 0.080      | 0.079      | 0.094     | 0.116     | 0.044     | 0.042     |

$$(\alpha_1, \alpha_2, \alpha_3, \alpha_4, \alpha_5, \alpha_6) = (-3.410, -3.027, -2.641, -2.249, -1.849, -1.435);$$

$$(\beta_1, \beta_2, \beta_3, \beta_4) = (\log(1.5), \log(0.7), \log(1.3), -\log(1.3)) \approx (0.405, -0.357, 0.262, -0.262).$$

Table B.4: Relative performance for the estimation of regression parameters is compared for (i) the complete case analysis with simple random sampling (CC-SRS), (ii) the mean score method with simple random sampling (MS-SRS), (iii) a design-based estimation with balanced sample, equivalent to the mean score (MS-BAL), (iv & v) the mean score estimation with adaptive sampling (MS-A) and the optimal sampling design (MS-O), where  $n = 400$  subsample was drawn from the full cohort size of  $N = 4000$ . Results for the full cohort estimator based on complete data are provided as a benchmark. Mean squared error (MSE) and its bias-variance decomposition are estimated from 1000 Monte Carlo replications, where the censoring rate was 50%. The adaptive and optimal sampling designs were for efficient estimation of  $X_1$  with  $\beta_1 = \log(1.5) \approx 0.405$ .

| Sample size | Sampling             | Estimation | Criterion           | Estimation performance by regression coefficient |            |            |            |            |            |           |           |           |           |        |
|-------------|----------------------|------------|---------------------|--------------------------------------------------|------------|------------|------------|------------|------------|-----------|-----------|-----------|-----------|--------|
|             |                      |            |                     | $\alpha_1$                                       | $\alpha_2$ | $\alpha_3$ | $\alpha_4$ | $\alpha_5$ | $\alpha_6$ | $\beta_1$ | $\beta_2$ | $\beta_3$ | $\beta_4$ |        |
| $n = 400$   | SRS                  | CC         | $\sqrt{\text{MSE}}$ | 0.377                                            | 0.347      | 0.319      | 0.295      | 0.288      | 0.280      | 0.330     | 0.404     | 0.146     | 0.143     |        |
|             |                      |            | Bias                | -0.050                                           | -0.045     | -0.037     | -0.014     | -0.025     | -0.008     | 0.014     | 0.000     | 0.006     | -0.004    |        |
|             |                      |            | $\sqrt{\text{Var}}$ | 0.374                                            | 0.344      | 0.316      | 0.295      | 0.287      | 0.280      | 0.329     | 0.404     | 0.146     | 0.143     |        |
|             |                      | MS         | $\sqrt{\text{MSE}}$ | 0.253                                            | 0.226      | 0.216      | 0.209      | 0.204      | 0.203      | 0.220     | 0.423     | 0.154     | 0.147     |        |
|             |                      |            | Bias                | -0.081                                           | -0.046     | -0.039     | -0.032     | -0.030     | -0.022     | 0.035     | 0.005     | 0.007     | -0.005    |        |
|             |                      |            | $\sqrt{\text{Var}}$ | 0.240                                            | 0.222      | 0.213      | 0.207      | 0.202      | 0.202      | 0.217     | 0.423     | 0.154     | 0.147     |        |
|             | Balanced             | MS         | $\sqrt{\text{MSE}}$ | 0.284                                            | 0.279      | 0.276      | 0.276      | 0.277      | 0.277      | 0.278     | 0.582     | 0.200     | 0.204     |        |
|             |                      |            | Bias                | -0.014                                           | -0.003     | -0.004     | -0.000     | 0.003      | 0.016      | 0.024     | -0.007    | 0.006     | -0.015    |        |
|             |                      |            | $\sqrt{\text{Var}}$ | 0.284                                            | 0.279      | 0.276      | 0.276      | 0.277      | 0.277      | 0.277     | 0.582     | 0.200     | 0.204     |        |
| $N = 4000$  | Adaptive             | MS         | $\sqrt{\text{MSE}}$ | 0.210                                            | 0.200      | 0.201      | 0.201      | 0.198      | 0.201      | 0.197     | 0.426     | 0.147     | 0.147     |        |
|             |                      |            | Bias                | -0.013                                           | -0.003     | -0.005     | -0.003     | -0.002     | 0.005      | 0.007     | -0.014    | 0.006     | -0.009    |        |
|             |                      |            | $\sqrt{\text{Var}}$ | 0.210                                            | 0.200      | 0.200      | 0.201      | 0.198      | 0.200      | 0.197     | 0.426     | 0.147     | 0.147     |        |
|             |                      | Oracle     | MS                  | $\sqrt{\text{MSE}}$                              | 0.189      | 0.184      | 0.182      | 0.177      | 0.178      | 0.178     | 0.182     | 0.354     | 0.134     | 0.132  |
|             |                      |            |                     | Bias                                             | -0.003     | 0.007      | 0.005      | 0.006      | 0.005      | 0.011     | 0.003     | -0.014    | -0.005    | -0.008 |
|             |                      |            |                     | $\sqrt{\text{Var}}$                              | 0.189      | 0.184      | 0.182      | 0.177      | 0.178      | 0.177     | 0.182     | 0.354     | 0.133     | 0.132  |
|             | Full cohort analysis |            | $\sqrt{\text{MSE}}$ | 0.107                                            | 0.096      | 0.091      | 0.085      | 0.080      | 0.079      | 0.094     | 0.116     | 0.044     | 0.042     |        |
|             |                      |            | Bias                | -0.010                                           | 0.000      | -0.003     | -0.002     | -0.005     | -0.002     | 0.003     | -0.001    | -0.000    | 0.000     |        |
|             |                      |            | $\sqrt{\text{Var}}$ | 0.107                                            | 0.096      | 0.091      | 0.085      | 0.080      | 0.079      | 0.094     | 0.116     | 0.044     | 0.042     |        |

$$(\alpha_1, \alpha_2, \alpha_3, \alpha_4, \alpha_5, \alpha_6) = (-3.410, -3.027, -2.641, -2.249, -1.849, -1.435);$$

$$(\beta_1, \beta_2, \beta_3, \beta_4) = (\log(1.5), \log(0.7), \log(1.3), -\log(1.3)) \approx (0.405, -0.357, 0.262, -0.262).$$

Table B.5: Relative performance for the estimation of regression parameters is compared for (i) the complete case analysis with simple random sampling (CC-SRS), (ii) the mean score method with simple random sampling (MS-SRS), (iii) a design-based estimation with balanced sample, equivalent to the mean score (MS-BAL), (iv & v) the mean score estimation with adaptive sampling (MS-A) and the optimal sampling design (MS-O), where  $n = 800$  subsample was drawn from the full cohort size of  $N = 4000$ . Results for the full cohort estimator based on complete data are provided as a benchmark. Mean squared error (MSE) and its bias-variance decomposition are estimated from 1000 Monte Carlo replications, where the censoring rate was 50%. The adaptive and optimal sampling designs were for efficient estimation of  $X_1$  with  $\beta_1 = \log(1.5) \approx 0.405$ .

| Sample size          | Sampling | Estimation          | Criterion           | Estimation performance by regression coefficient |            |            |            |            |            |           |           |           |           |
|----------------------|----------|---------------------|---------------------|--------------------------------------------------|------------|------------|------------|------------|------------|-----------|-----------|-----------|-----------|
|                      |          |                     |                     | $\alpha_1$                                       | $\alpha_2$ | $\alpha_3$ | $\alpha_4$ | $\alpha_5$ | $\alpha_6$ | $\beta_1$ | $\beta_2$ | $\beta_3$ | $\beta_4$ |
| $n = 800$            | SRS      | CC                  | $\sqrt{\text{MSE}}$ | 0.262                                            | 0.239      | 0.220      | 0.206      | 0.199      | 0.191      | 0.228     | 0.286     | 0.101     | 0.101     |
|                      |          |                     | Bias                | -0.030                                           | -0.018     | -0.016     | -0.007     | -0.016     | -0.005     | 0.005     | 0.002     | 0.005     | -0.004    |
|                      |          |                     | $\sqrt{\text{Var}}$ | 0.260                                            | 0.238      | 0.220      | 0.206      | 0.198      | 0.191      | 0.228     | 0.286     | 0.101     | 0.101     |
|                      | MS       | $\sqrt{\text{MSE}}$ | 0.169               | 0.156                                            | 0.151      | 0.149      | 0.146      | 0.144      | 0.155      | 0.292     | 0.104     | 0.102     |           |
|                      |          | Bias                | -0.022              | -0.008                                           | -0.009     | -0.008     | -0.009     | -0.004     | 0.004      | 0.001     | 0.007     | -0.004    |           |
|                      |          | $\sqrt{\text{Var}}$ | 0.167               | 0.156                                            | 0.151      | 0.148      | 0.145      | 0.144      | 0.155      | 0.292     | 0.103     | 0.102     |           |
| $N = 4000$           | Balanced | MS                  | $\sqrt{\text{MSE}}$ | 0.202                                            | 0.196      | 0.193      | 0.191      | 0.189      | 0.190      | 0.194     | 0.396     | 0.145     | 0.141     |
|                      |          |                     | Bias                | -0.017                                           | -0.006     | -0.009     | -0.007     | -0.007     | 0.000      | 0.010     | 0.008     | -0.002    | 0.002     |
|                      |          |                     | $\sqrt{\text{Var}}$ | 0.201                                            | 0.195      | 0.193      | 0.190      | 0.189      | 0.190      | 0.194     | 0.396     | 0.145     | 0.141     |
|                      | Adaptive | MS                  | $\sqrt{\text{MSE}}$ | 0.154                                            | 0.149      | 0.145      | 0.142      | 0.139      | 0.140      | 0.147     | 0.280     | 0.099     | 0.102     |
|                      |          |                     | Bias                | -0.010                                           | -0.001     | -0.003     | -0.003     | -0.003     | 0.001      | 0.006     | -0.010    | 0.005     | -0.003    |
|                      |          |                     | $\sqrt{\text{Var}}$ | 0.154                                            | 0.149      | 0.145      | 0.142      | 0.139      | 0.140      | 0.147     | 0.280     | 0.099     | 0.102     |
|                      | Oracle   | MS                  | $\sqrt{\text{MSE}}$ | 0.147                                            | 0.139      | 0.137      | 0.135      | 0.131      | 0.131      | 0.133     | 0.261     | 0.096     | 0.095     |
|                      |          |                     | Bias                | -0.004                                           | 0.006      | 0.003      | 0.004      | 0.003      | 0.007      | 0.005     | -0.018    | 0.002     | -0.005    |
|                      |          |                     | $\sqrt{\text{Var}}$ | 0.147                                            | 0.139      | 0.137      | 0.135      | 0.131      | 0.131      | 0.133     | 0.260     | 0.096     | 0.095     |
| Full cohort analysis |          |                     | $\sqrt{\text{MSE}}$ | 0.107                                            | 0.096      | 0.091      | 0.085      | 0.080      | 0.079      | 0.094     | 0.116     | 0.044     | 0.042     |
|                      |          |                     | Bias                | -0.010                                           | 0.000      | -0.003     | -0.002     | -0.005     | -0.002     | 0.003     | -0.001    | -0.000    | 0.000     |
|                      |          |                     | $\sqrt{\text{Var}}$ | 0.107                                            | 0.096      | 0.091      | 0.085      | 0.080      | 0.079      | 0.094     | 0.116     | 0.044     | 0.042     |

$$(\alpha_1, \alpha_2, \alpha_3, \alpha_4, \alpha_5, \alpha_6) = (-3.410, -3.027, -2.641, -2.249, -1.849, -1.435);$$

$$(\beta_1, \beta_2, \beta_3, \beta_4) = (\log(1.5), \log(0.7), \log(1.3), -\log(1.3)) \approx (0.405, -0.357, 0.262, -0.262).$$

Table B.6: Relative performance for the estimation of regression parameters is compared for (i) the complete case analysis with simple random sampling (CC-SRS), (ii) the mean score method with simple random sampling (MS-SRS), (iii) a design-based estimation with balanced sample, equivalent to the mean score (MS-BAL), (iv & v) the mean score estimation with adaptive sampling (MS-A) and the optimal sampling design (MS-O), where  $n = 400$  subsample was drawn from the full cohort size of  $N = 2000$ . Results for the full cohort estimator based on complete data are provided as a benchmark. Mean squared error (MSE) and its bias-variance decomposition are estimated from 1000 Monte Carlo replications, where the censoring rate was 50%. The adaptive and optimal sampling designs were for efficient estimation of  $X_1$  with  $\beta_1 = \log(1.5) \approx 0.405$ .

| Sample size | Sampling             | Estimation | Criterion           | Estimation performance by regression coefficient |            |            |            |            |            |           |           |           |           |
|-------------|----------------------|------------|---------------------|--------------------------------------------------|------------|------------|------------|------------|------------|-----------|-----------|-----------|-----------|
|             |                      |            |                     | $\alpha_1$                                       | $\alpha_2$ | $\alpha_3$ | $\alpha_4$ | $\alpha_5$ | $\alpha_6$ | $\beta_1$ | $\beta_2$ | $\beta_3$ | $\beta_4$ |
| $n = 400$   | SRS                  | CC         | $\sqrt{\text{MSE}}$ | 0.381                                            | 0.342      | 0.323      | 0.288      | 0.281      | 0.284      | 0.324     | 0.419     | 0.145     | 0.147     |
|             |                      |            | Bias                | -0.049                                           | -0.044     | -0.039     | -0.025     | -0.020     | -0.019     | -0.011    | 0.029     | 0.006     | -0.005    |
|             |                      |            | $\sqrt{\text{Var}}$ | 0.378                                            | 0.340      | 0.321      | 0.287      | 0.280      | 0.283      | 0.324     | 0.418     | 0.145     | 0.147     |
|             |                      | MS         | $\sqrt{\text{MSE}}$ | 0.267                                            | 0.245      | 0.232      | 0.224      | 0.217      | 0.223      | 0.237     | 0.434     | 0.150     | 0.156     |
|             |                      |            | Bias                | -0.072                                           | -0.050     | -0.044     | -0.036     | -0.028     | -0.031     | 0.020     | 0.027     | 0.005     | -0.004    |
|             |                      |            | $\sqrt{\text{Var}}$ | 0.258                                            | 0.240      | 0.228      | 0.221      | 0.215      | 0.221      | 0.236     | 0.433     | 0.150     | 0.156     |
|             | Balanced             | MS         | $\sqrt{\text{MSE}}$ | 0.278                                            | 0.275      | 0.267      | 0.266      | 0.263      | 0.266      | 0.276     | 0.550     | 0.200     | 0.198     |
|             |                      |            | Bias                | -0.024                                           | -0.018     | -0.019     | -0.014     | -0.006     | -0.003     | 0.026     | -0.005    | 0.013     | -0.005    |
|             |                      |            | $\sqrt{\text{Var}}$ | 0.277                                            | 0.274      | 0.266      | 0.265      | 0.263      | 0.266      | 0.275     | 0.550     | 0.199     | 0.198     |
| $N = 2000$  | Adaptive             | MS         | $\sqrt{\text{MSE}}$ | 0.233                                            | 0.220      | 0.211      | 0.210      | 0.207      | 0.210      | 0.214     | 0.421     | 0.152     | 0.148     |
|             |                      |            | Bias                | -0.019                                           | -0.014     | -0.016     | -0.012     | -0.005     | -0.007     | 0.004     | 0.006     | 0.010     | -0.016    |
|             |                      |            | $\sqrt{\text{Var}}$ | 0.232                                            | 0.219      | 0.210      | 0.209      | 0.207      | 0.210      | 0.214     | 0.421     | 0.152     | 0.147     |
|             | Oracle               | MS         | $\sqrt{\text{MSE}}$ | 0.215                                            | 0.204      | 0.195      | 0.195      | 0.186      | 0.195      | 0.202     | 0.383     | 0.134     | 0.136     |
|             |                      |            | Bias                | -0.021                                           | -0.012     | -0.014     | -0.010     | -0.004     | -0.008     | -0.012    | 0.021     | 0.001     | -0.004    |
|             |                      |            | $\sqrt{\text{Var}}$ | 0.214                                            | 0.203      | 0.194      | 0.194      | 0.186      | 0.195      | 0.202     | 0.382     | 0.134     | 0.136     |
|             | Full cohort analysis |            | $\sqrt{\text{MSE}}$ | 0.152                                            | 0.136      | 0.124      | 0.121      | 0.112      | 0.118      | 0.129     | 0.172     | 0.062     | 0.061     |
|             |                      |            | Bias                | -0.009                                           | -0.005     | -0.008     | -0.006     | -0.002     | -0.008     | -0.004    | 0.010     | 0.001     | -0.001    |
|             |                      |            | $\sqrt{\text{Var}}$ | 0.152                                            | 0.136      | 0.124      | 0.121      | 0.112      | 0.118      | 0.129     | 0.171     | 0.062     | 0.061     |

$$(\alpha_1, \alpha_2, \alpha_3, \alpha_4, \alpha_5, \alpha_6) = (-3.410, -3.027, -2.641, -2.249, -1.849, -1.435);$$

$$(\beta_1, \beta_2, \beta_3, \beta_4) = (\log(1.5), \log(0.7), \log(1.3), -\log(1.3)) \approx (0.405, -0.357, 0.262, -0.262).$$

Table B.7: Relative performance for the estimation of regression parameters is compared for (i) the complete case analysis with simple random sampling (CC-SRS), (ii) the mean score method with simple random sampling (MS-SRS), (iii) a design-based estimation with balanced sample, equivalent to the mean score (MS-BAL), (iv & v) the mean score estimation with adaptive sampling (MS-A) and the optimal sampling design (MS-O), where  $n = 400$  subsample was drawn from the full cohort size of  $N = 8000$ . Results for the full cohort estimator based on complete data are provided as a benchmark. Mean squared error (MSE) and its bias-variance decomposition are estimated from 1000 Monte Carlo replications, where the censoring rate was 50%. The adaptive and optimal sampling designs were for efficient estimation of  $X_1$  with  $\beta_1 = \log(1.5) \approx 0.405$ .

| Sample size          | Sampling | Estimation          | Criterion           | Estimation performance by regression coefficient |            |            |            |            |            |           |           |           |           |
|----------------------|----------|---------------------|---------------------|--------------------------------------------------|------------|------------|------------|------------|------------|-----------|-----------|-----------|-----------|
|                      |          |                     |                     | $\alpha_1$                                       | $\alpha_2$ | $\alpha_3$ | $\alpha_4$ | $\alpha_5$ | $\alpha_6$ | $\beta_1$ | $\beta_2$ | $\beta_3$ | $\beta_4$ |
| $n = 400$            | SRS      | CC                  | $\sqrt{\text{MSE}}$ | 0.381                                            | 0.334      | 0.316      | 0.289      | 0.281      | 0.280      | 0.321     | 0.419     | 0.155     | 0.149     |
|                      |          |                     | Bias                | -0.042                                           | -0.037     | -0.034     | -0.020     | -0.014     | -0.004     | -0.001    | 0.001     | 0.012     | -0.007    |
|                      |          |                     | $\sqrt{\text{Var}}$ | 0.379                                            | 0.332      | 0.314      | 0.288      | 0.280      | 0.280      | 0.321     | 0.419     | 0.154     | 0.149     |
|                      | MS       | $\sqrt{\text{MSE}}$ | 0.236               | 0.211                                            | 0.208      | 0.201      | 0.199      | 0.200      | 0.200      | 0.435     | 0.162     | 0.157     |           |
|                      |          | Bias                | -0.071              | -0.043                                           | -0.034     | -0.028     | -0.022     | -0.017     | 0.027      | -0.000    | 0.015     | -0.009    |           |
|                      |          | $\sqrt{\text{Var}}$ | 0.225               | 0.206                                            | 0.205      | 0.199      | 0.198      | 0.200      | 0.198      | 0.435     | 0.161     | 0.157     |           |
| $N = 8000$           | Balanced | MS                  | $\sqrt{\text{MSE}}$ | 0.272                                            | 0.271      | 0.271      | 0.268      | 0.269      | 0.270      | 0.265     | 0.572     | 0.211     | 0.207     |
|                      |          |                     | Bias                | -0.012                                           | -0.009     | -0.007     | -0.004     | 0.004      | 0.014      | 0.021     | -0.002    | 0.007     | -0.017    |
|                      |          |                     | $\sqrt{\text{Var}}$ | 0.272                                            | 0.271      | 0.271      | 0.268      | 0.269      | 0.270      | 0.264     | 0.572     | 0.211     | 0.207     |
| Adaptive             | MS       | $\sqrt{\text{MSE}}$ | 0.196               | 0.194                                            | 0.195      | 0.193      | 0.194      | 0.195      | 0.190      | 0.417     | 0.153     | 0.148     |           |
|                      |          | Bias                | -0.009              | -0.008                                           | -0.007     | -0.005     | -0.001     | 0.004      | 0.002      | -0.014    | 0.008     | 0.001     |           |
|                      |          | $\sqrt{\text{Var}}$ | 0.196               | 0.193                                            | 0.195      | 0.193      | 0.194      | 0.195      | 0.189      | 0.417     | 0.153     | 0.148     |           |
| Oracle               | MS       | $\sqrt{\text{MSE}}$ | 0.178               | 0.174                                            | 0.170      | 0.170      | 0.171      | 0.172      | 0.174      | 0.362     | 0.134     | 0.133     |           |
|                      |          | Bias                | -0.006              | -0.004                                           | -0.002     | -0.002     | 0.002      | 0.005      | -0.005     | -0.010    | -0.001    | 0.008     |           |
|                      |          | $\sqrt{\text{Var}}$ | 0.178               | 0.174                                            | 0.170      | 0.170      | 0.171      | 0.172      | 0.174      | 0.362     | 0.134     | 0.133     |           |
| Full cohort analysis |          |                     | $\sqrt{\text{MSE}}$ | 0.076                                            | 0.071      | 0.063      | 0.060      | 0.057      | 0.055      | 0.067     | 0.085     | 0.030     | 0.031     |
|                      |          |                     | Bias                | -0.002                                           | -0.001     | -0.001     | -0.001     | 0.001      | 0.001      | 0.000     | -0.003    | 0.001     | 0.000     |
|                      |          |                     | $\sqrt{\text{Var}}$ | 0.076                                            | 0.071      | 0.063      | 0.060      | 0.057      | 0.055      | 0.067     | 0.085     | 0.030     | 0.031     |

$$(\alpha_1, \alpha_2, \alpha_3, \alpha_4, \alpha_5, \alpha_6) = (-3.410, -3.027, -2.641, -2.249, -1.849, -1.435);$$

$$(\beta_1, \beta_2, \beta_3, \beta_4) = (\log(1.5), \log(0.7), \log(1.3), -\log(1.3)) \approx (0.405, -0.357, 0.262, -0.262).$$

## B.2 Two-phase analysis with the modified sampling design

Table B.8: Modification of the proposed mean score sampling design for the discrete-time survival analysis of the National Wilms Tumor Study to include all individuals regardless of the time to censoring ( $N = 3915$ ). Similarly to Table 2, we compare five different methods (CC-SRS, MS-SRS, MS-BAL, MS-A, MS-O) as well as two modified designs by under-sampling the censored individuals not relapsing before the end of the follow-up period in the balanced and the pilot sample.<sup>†,‡</sup> The optimal sampling design was estimated using the full cohort data. The MS-A and MS-O designs are for efficient estimation of the interaction effect between unfavorable histology and disease stage. Results from the full cohort analysis with complete data are presented as a benchmark. Mean squared error and its bias-variance decomposition are estimated using 1000 phase two samples of  $n = 400$  from the full cohort ( $N = 3915$ ).

| Sampling                             | Estimation | Criterion           | Baseline hazard in complementary log-log scale |        |        |        |        |        | Regression coefficient |                    |                  |                   |                  |
|--------------------------------------|------------|---------------------|------------------------------------------------|--------|--------|--------|--------|--------|------------------------|--------------------|------------------|-------------------|------------------|
|                                      |            |                     | 0.5yr                                          | 1yr    | 1.5yr  | 2yr    | 2.5yr  | 3yr    | UH <sup>1</sup>        | Stage <sup>2</sup> | Age <sup>3</sup> | dTmr <sup>4</sup> | U*S <sup>5</sup> |
| Full cohort analysis                 |            | Ref.                | -4.074                                         | -3.916 | -4.373 | -5.037 | -5.378 | -5.737 | 1.087                  | 0.287              | 0.064            | 0.031             | 0.632            |
| SRS                                  | CC         | $\sqrt{\text{MSE}}$ | 0.469                                          | 0.460  | 0.479  | 0.706  | 1.537  | 2.601  | 0.640                  | 0.340              | 0.050            | 0.034             | 0.763            |
|                                      |            | Bias                | -0.074                                         | -0.067 | -0.074 | -0.136 | -0.283 | -0.694 | -0.025                 | -0.011             | -0.001           | 0.001             | 0.070            |
|                                      |            | $\sqrt{\text{Var}}$ | 0.463                                          | 0.455  | 0.473  | 0.693  | 1.511  | 2.507  | 0.640                  | 0.340              | 0.050            | 0.034             | 0.759            |
|                                      | MS         | $\sqrt{\text{MSE}}$ | 0.433                                          | 0.428  | 0.429  | 0.580  | 1.464  | 2.587  | 0.635                  | 0.355              | 0.051            | 0.037             | 0.815            |
|                                      |            | Bias                | -0.028                                         | -0.023 | -0.035 | -0.109 | -0.330 | -0.829 | -0.102                 | -0.005             | 0.001            | 0.001             | 0.131            |
|                                      |            | $\sqrt{\text{Var}}$ | 0.432                                          | 0.428  | 0.428  | 0.570  | 1.426  | 2.450  | 0.627                  | 0.355              | 0.051            | 0.037             | 0.804            |
| Balanced                             | MS         | $\sqrt{\text{MSE}}$ | 0.512                                          | 0.504  | 0.493  | 0.485  | 0.482  | 0.481  | 0.460                  | 0.437              | 0.068            | 0.043             | 0.712            |
|                                      |            | Bias                | -0.123                                         | -0.105 | -0.088 | -0.077 | -0.071 | -0.067 | 0.048                  | 0.046              | 0.018            | 0.004             | -0.051           |
|                                      |            | $\sqrt{\text{Var}}$ | 0.497                                          | 0.492  | 0.485  | 0.479  | 0.477  | 0.476  | 0.457                  | 0.435              | 0.066            | 0.042             | 0.710            |
| Balanced<br>( <sup>†</sup> modified) | MS         | $\sqrt{\text{MSE}}$ | 0.436                                          | 0.428  | 0.419  | 0.412  | 0.410  | 0.409  | 0.403                  | 0.371              | 0.061            | 0.036             | 0.614            |
|                                      |            | Bias                | -0.090                                         | -0.075 | -0.062 | -0.054 | -0.049 | -0.046 | 0.038                  | 0.009              | 0.016            | 0.003             | 0.002            |
|                                      |            | $\sqrt{\text{Var}}$ | 0.426                                          | 0.421  | 0.415  | 0.409  | 0.407  | 0.406  | 0.401                  | 0.371              | 0.059            | 0.036             | 0.614            |
| Adaptive                             | MS         | $\sqrt{\text{MSE}}$ | 0.350                                          | 0.343  | 0.336  | 0.331  | 0.329  | 0.327  | 0.326                  | 0.313              | 0.045            | 0.028             | 0.519            |
|                                      |            | Bias                | -0.071                                         | -0.060 | -0.052 | -0.047 | -0.044 | -0.042 | -0.010                 | 0.002              | 0.009            | 0.003             | 0.056            |
|                                      |            | $\sqrt{\text{Var}}$ | 0.342                                          | 0.337  | 0.332  | 0.327  | 0.326  | 0.325  | 0.326                  | 0.313              | 0.044            | 0.027             | 0.516            |
| Adaptive<br>( <sup>‡</sup> modified) | MS         | $\sqrt{\text{MSE}}$ | 0.342                                          | 0.336  | 0.329  | 0.324  | 0.323  | 0.322  | 0.290                  | 0.266              | 0.042            | 0.027             | 0.448            |
|                                      |            | Bias                | -0.060                                         | -0.052 | -0.045 | -0.040 | -0.038 | -0.036 | -0.003                 | -0.014             | 0.009            | 0.002             | 0.057            |
|                                      |            | $\sqrt{\text{Var}}$ | 0.337                                          | 0.332  | 0.326  | 0.322  | 0.320  | 0.320  | 0.290                  | 0.265              | 0.041            | 0.027             | 0.445            |
| Oracle                               | MS         | $\sqrt{\text{MSE}}$ | 0.269                                          | 0.267  | 0.264  | 0.261  | 0.261  | 0.260  | 0.234                  | 0.232              | 0.035            | 0.022             | 0.379            |
|                                      |            | Bias                | -0.007                                         | -0.009 | -0.008 | -0.006 | -0.006 | -0.005 | 0.006                  | 0.008              | 0.002            | -0.000            | 0.030            |
|                                      |            | $\sqrt{\text{Var}}$ | 0.269                                          | 0.267  | 0.264  | 0.261  | 0.261  | 0.260  | 0.234                  | 0.232              | 0.034            | 0.022             | 0.377            |

<sup>1</sup> Unfavorable histology versus favorable; <sup>2</sup> disease stage III/IV versus I/II;

<sup>3</sup> year at diagnosis; <sup>4</sup> tumor diameter (cm); <sup>5</sup> interaction effect between UH and Stage.

Table B.9: Modification of the proposed mean score sampling design for the two-phase continuous-time Cox model analysis of time to relapse in the National Wilms Tumor Study to include all individuals regardless of the time to censoring ( $N = 3915$ ). Similarly to Table 4, we used inverse probability weights (IPW) for the two-phase analysis for four different sampling designs for the second phase; (i) simple random sampling (SRS), (ii) balanced sampling, (iii & iv) the proposed adaptive and oracle sampling designs as well as two modified designs by under-sampling the censored individuals not relapsing before the end of the follow-up period in the balanced and the pilot sample.<sup>†,‡</sup> Here, the adaptive and oracle designs were determined by the mean score method for the discrete-time survival analysis. The target parameter for the mean score design was the interaction between unfavorable histology and late stage disease. Mean squared error and its bias-variance decomposition are estimated from 1000 phase two subsamples of  $n = 400$  from the full cohort. Reference parameters estimates are from the full cohort analysis using the continuous-time Cox model with complete data on all subjects.

| Sampling                             | Criterion           | Estimation performance by regressor |                    |                  |                   |                  |
|--------------------------------------|---------------------|-------------------------------------|--------------------|------------------|-------------------|------------------|
|                                      |                     | UH <sup>1</sup>                     | Stage <sup>2</sup> | Age <sup>3</sup> | dTmr <sup>4</sup> | U*S <sup>5</sup> |
| Full cohort analysis                 | Ref.                | 1.050                               | 0.297              | 0.065            | 0.021             | 0.620            |
| SRS                                  | $\sqrt{\text{MSE}}$ | 0.444                               | 0.322              | 0.049            | 0.033             | 0.648            |
|                                      | Bias                | -0.092                              | 0.009              | -0.000           | 0.000             | 0.115            |
|                                      | $\sqrt{\text{Var}}$ | 0.434                               | 0.322              | 0.049            | 0.033             | 0.638            |
| Balanced                             | $\sqrt{\text{MSE}}$ | 0.478                               | 0.519              | 0.074            | 0.049             | 0.752            |
|                                      | Bias                | 0.061                               | 0.032              | 0.016            | 0.006             | -0.037           |
|                                      | $\sqrt{\text{Var}}$ | 0.474                               | 0.518              | 0.072            | 0.048             | 0.751            |
| Balanced<br>( <sup>†</sup> modified) | $\sqrt{\text{MSE}}$ | 0.440                               | 0.434              | 0.065            | 0.043             | 0.643            |
|                                      | Bias                | 0.039                               | 0.012              | 0.011            | 0.008             | 0.025            |
|                                      | $\sqrt{\text{Var}}$ | 0.438                               | 0.434              | 0.065            | 0.043             | 0.643            |
| Adaptive                             | $\sqrt{\text{MSE}}$ | 0.338                               | 0.373              | 0.052            | 0.034             | 0.541            |
|                                      | Bias                | -0.001                              | 0.005              | 0.005            | 0.002             | 0.035            |
|                                      | $\sqrt{\text{Var}}$ | 0.338                               | 0.373              | 0.052            | 0.034             | 0.540            |
| Adaptive<br>( <sup>†</sup> modified) | $\sqrt{\text{MSE}}$ | 0.328                               | 0.325              | 0.050            | 0.031             | 0.493            |
|                                      | Bias                | -0.023                              | 0.000              | 0.008            | 0.002             | 0.053            |
|                                      | $\sqrt{\text{Var}}$ | 0.327                               | 0.325              | 0.049            | 0.031             | 0.491            |
| Oracle                               | $\sqrt{\text{MSE}}$ | 0.255                               | 0.250              | 0.041            | 0.025             | 0.396            |
|                                      | Bias                | -0.001                              | -0.006             | 0.004            | 0.001             | 0.043            |
|                                      | $\sqrt{\text{Var}}$ | 0.255                               | 0.250              | 0.041            | 0.025             | 0.393            |

<sup>1</sup> Unfavorable histology versus favorable; <sup>2</sup> disease stage III/IV versus I/II;

<sup>3</sup> year at diagnosis; <sup>4</sup> tumor diameter (cm); <sup>5</sup> interaction effect between UH and Stage.

Table B.10: Modification of the proposed mean score sampling design for the two-phase continuous-time Cox model analysis with the exponential survival function. We used inverse probability weights (IPW) for the two-phase analysis for four different sampling designs for the second phase; (i) simple random sampling (SRS), (ii) balanced sampling, (iii & iv) the proposed adaptive and oracle sampling designs as well as two modified designs by under-sampling individuals censored before the maximum follow-up period  $t_6$  in the balanced and the pilot sample.<sup>†,‡</sup> Here, the adaptive and oracle designs were determined by the mean score method for the discrete-time survival analysis. The target parameter for the mean score design was  $\beta_1 = \log(1.5) \approx 0.405$ . Mean squared error and its bias-variance decomposition are estimated from 1000 Monte Carlo replications, where the censoring rate was 70%. The full cohort analysis provides a benchmark for performance, the continuous-time Cox model was fit using the complete data on all subjects.

| Sampling                             | Criterion           | Estimation performance by sample sizes |           |           |            |            |            |
|--------------------------------------|---------------------|----------------------------------------|-----------|-----------|------------|------------|------------|
|                                      |                     | $N = 4000$                             |           |           | $n = 400$  |            |            |
|                                      |                     | $n = 200$                              | $n = 400$ | $n = 800$ | $N = 2000$ | $N = 4000$ | $N = 8000$ |
| Full cohort                          | $\sqrt{\text{MSE}}$ | 0.174                                  | 0.174     | 0.174     | 0.252      | 0.174      | 0.125      |
|                                      | Bias                | 0.004                                  | 0.004     | 0.004     | 0.011      | 0.004      | -0.001     |
|                                      | $\sqrt{\text{Var}}$ | 0.174                                  | 0.174     | 0.174     | 0.252      | 0.174      | 0.125      |
| SRS                                  | $\sqrt{\text{MSE}}$ | 0.512                                  | 0.395     | 0.286     | 0.424      | 0.395      | 0.393      |
|                                      | Bias                | -0.027                                 | -0.012    | 0.004     | 0.027      | -0.012     | 0.010      |
|                                      | $\sqrt{\text{Var}}$ | 0.511                                  | 0.395     | 0.286     | 0.423      | 0.395      | 0.393      |
| Balanced                             | $\sqrt{\text{MSE}}$ | 0.826                                  | 0.506     | 0.340     | 0.499      | 0.506      | 0.504      |
|                                      | Bias                | 0.160                                  | 0.084     | 0.032     | 0.069      | 0.084      | 0.069      |
|                                      | $\sqrt{\text{Var}}$ | 0.810                                  | 0.499     | 0.338     | 0.495      | 0.499      | 0.499      |
| Balanced<br>( <sup>†</sup> modified) | $\sqrt{\text{MSE}}$ | 0.637                                  | 0.429     | 0.274     | 0.403      | 0.429      | 0.408      |
|                                      | Bias                | 0.139                                  | 0.044     | 0.035     | 0.057      | 0.044      | 0.069      |
|                                      | $\sqrt{\text{Var}}$ | 0.621                                  | 0.427     | 0.271     | 0.399      | 0.427      | 0.402      |
| Adaptive                             | $\sqrt{\text{MSE}}$ | 0.791                                  | 0.347     | 0.231     | 0.395      | 0.347      | 0.331      |
|                                      | Bias                | 0.118                                  | 0.015     | 0.026     | 0.046      | 0.015      | 0.015      |
|                                      | $\sqrt{\text{Var}}$ | 0.782                                  | 0.347     | 0.230     | 0.392      | 0.347      | 0.330      |
| Adaptive<br>( <sup>‡</sup> modified) | $\sqrt{\text{MSE}}$ | 0.599                                  | 0.297     | 0.223     | 0.337      | 0.297      | 0.287      |
|                                      | Bias                | 0.090                                  | 0.026     | 0.012     | 0.039      | 0.026      | 0.000      |
|                                      | $\sqrt{\text{Var}}$ | 0.592                                  | 0.296     | 0.223     | 0.334      | 0.296      | 0.287      |
| Oracle                               | $\sqrt{\text{MSE}}$ | 0.384                                  | 0.272     | 0.218     | 0.320      | 0.272      | 0.266      |
|                                      | Bias                | -0.003                                 | 0.004     | 0.005     | 0.015      | 0.004      | -0.005     |
|                                      | $\sqrt{\text{Var}}$ | 0.384                                  | 0.272     | 0.218     | 0.319      | 0.272      | 0.266      |

$$(\beta_1, \beta_2, \beta_3, \beta_4) = (\log(1.5), \log(0.7), \log(1.3), -\log(1.3)).$$

Table B.11: The phase two sampling design for a single dataset analysis in the simulation study for Table B.10. We demonstrated the stratified sampling size for the proposed adaptive and oracle sampling designs as well as the modified design by under-sampling individuals censored before the maximum follow-up period  $t_6$  in the pilot sample.<sup>†,‡</sup> The full cohort panel shows the information of the phase one study.

| Sampling                             | Stratification | $Y = t_1$ | $Y = t_2$ | $Y = t_3$ | $Y = t_4$ | $Y = t_5$ | $Y = t_6$ | Sum  |      |
|--------------------------------------|----------------|-----------|-----------|-----------|-----------|-----------|-----------|------|------|
| Full cohort                          | $\Delta = 0$   | $Z = 1$   | 31        | 19        | 15        | 13        | 14        | 291  | 383  |
|                                      |                | $Z = 2$   | 56        | 56        | 24        | 34        | 30        | 637  | 837  |
|                                      |                | $Z = 3$   | 71        | 60        | 39        | 45        | 37        | 742  | 994  |
|                                      |                | $Z = 4$   | 61        | 60        | 48        | 35        | 27        | 572  | 803  |
|                                      |                | Sum       | 219       | 195       | 126       | 127       | 108       | 2242 | 3017 |
|                                      | $\Delta = 1$   | $Z = 1$   | 17        | 26        | 14        | 20        | 16        | 17   | 110  |
|                                      |                | $Z = 2$   | 49        | 47        | 32        | 30        | 37        | 20   | 215  |
|                                      |                | $Z = 3$   | 73        | 82        | 64        | 47        | 49        | 40   | 355  |
|                                      |                | $Z = 4$   | 79        | 59        | 52        | 35        | 45        | 33   | 303  |
|                                      |                | Sum       | 218       | 214       | 162       | 132       | 147       | 110  | 983  |
| Adaptive                             | $\Delta = 0$   | $Z = 1$   | 4         | 7         | 4         | 4         | 4         | 25   | 48   |
|                                      |                | $Z = 2$   | 4         | 4         | 4         | 4         | 4         | 36   | 56   |
|                                      |                | $Z = 3$   | 4         | 4         | 4         | 4         | 4         | 22   | 42   |
|                                      |                | $Z = 4$   | 4         | 4         | 4         | 4         | 6         | 45   | 67   |
|                                      |                | Sum       | 16        | 19        | 16        | 16        | 18        | 128  | 213  |
|                                      | $\Delta = 1$   | $Z = 1$   | 6         | 4         | 5         | 4         | 4         | 4    | 27   |
|                                      |                | $Z = 2$   | 5         | 6         | 4         | 6         | 7         | 5    | 33   |
|                                      |                | $Z = 3$   | 27        | 27        | 6         | 10        | 4         | 4    | 78   |
|                                      |                | $Z = 4$   | 18        | 8         | 7         | 4         | 7         | 5    | 49   |
|                                      |                | Sum       | 56        | 45        | 22        | 24        | 22        | 18   | 187  |
| Adaptive<br>( <sup>†</sup> modified) | $\Delta = 0$   | $Z = 1$   | 2         | 2         | 2         | 2         | 2         | 8    | 18   |
|                                      |                | $Z = 2$   | 2         | 2         | 2         | 2         | 2         | 60   | 70   |
|                                      |                | $Z = 3$   | 2         | 3         | 2         | 2         | 2         | 45   | 56   |
|                                      |                | $Z = 4$   | 2         | 2         | 2         | 2         | 4         | 44   | 56   |
|                                      |                | Sum       | 8         | 9         | 8         | 8         | 10        | 157  | 200  |
|                                      | $\Delta = 1$   | $Z = 1$   | 6         | 6         | 5         | 6         | 6         | 5    | 34   |
|                                      |                | $Z = 2$   | 8         | 7         | 8         | 6         | 8         | 6    | 43   |
|                                      |                | $Z = 3$   | 16        | 24        | 17        | 9         | 9         | 6    | 81   |
|                                      |                | $Z = 4$   | 11        | 7         | 6         | 6         | 6         | 6    | 42   |
|                                      |                | Sum       | 41        | 44        | 36        | 27        | 29        | 23   | 200  |
| Oracle                               | $\Delta = 0$   | $Z = 1$   | 1         | 1         | 1         | 1         | 1         | 24   | 29   |
|                                      |                | $Z = 2$   | 1         | 2         | 1         | 2         | 3         | 63   | 72   |
|                                      |                | $Z = 3$   | 1         | 2         | 2         | 3         | 4         | 90   | 102  |
|                                      |                | $Z = 4$   | 1         | 3         | 3         | 3         | 3         | 67   | 80   |
|                                      |                | Sum       | 4         | 8         | 7         | 9         | 11        | 244  | 283  |
|                                      | $\Delta = 1$   | $Z = 1$   | 3         | 3         | 1         | 2         | 2         | 2    | 13   |
|                                      |                | $Z = 2$   | 9         | 6         | 4         | 3         | 3         | 1    | 26   |
|                                      |                | $Z = 3$   | 12        | 13        | 8         | 5         | 5         | 3    | 46   |
|                                      |                | $Z = 4$   | 12        | 7         | 5         | 3         | 3         | 2    | 32   |
|                                      |                | Sum       | 36        | 29        | 18        | 13        | 13        | 8    | 117  |
